# Supplementary material
Source: PubMed Central journal article supplement (PMC8167437)

1 2 3 4 5 6

1,000 bp →

500 bp →

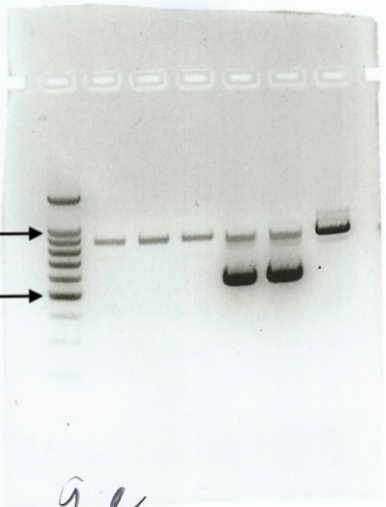

*Handwritten signature*

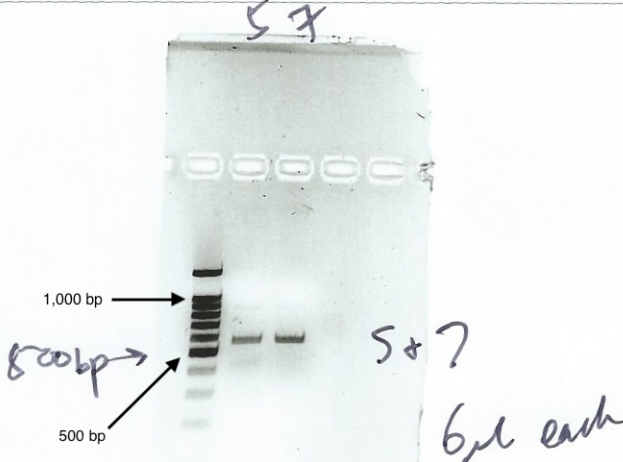

Supplement: NIHMS1698331-supplement-1698331_sup_E6.pdf [file NIHMS1698331-supplement-1698331_sup_E6.pdf]
